# Supplementary material for: Irradiation of necrotic cancer cells, employed for pulsing dendritic cells (DCs), potentiates DC vaccine-induced antitumor immunity against high-grade glioma
Source: PubMed Central journal article supplement — Oncoimmunology. 2015 Sep 11;5(2):e1083669. doi: 10.1080/2162402X.2015.1083669 (PMC4801426; doi:10.1080/2162402x.2015.1083669), 2015-09-11
Supplement: koni-05-02-1083669-s001.pdf [file koni-05-02-1083669-s001.pdf]

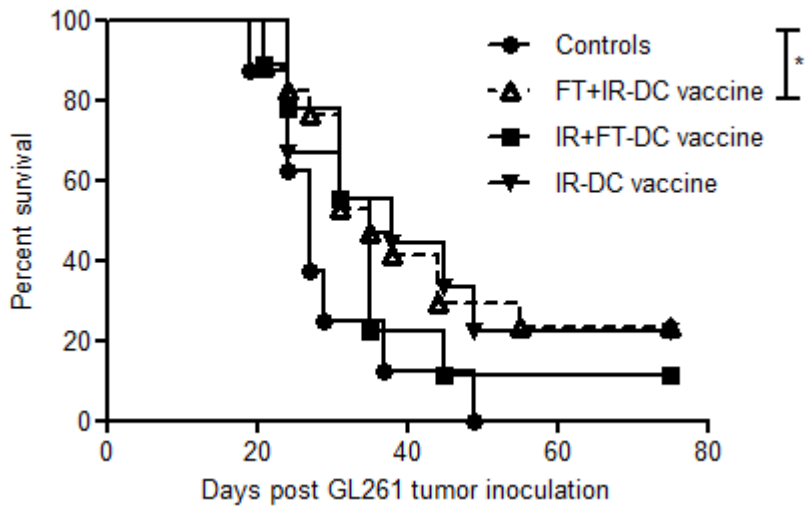

**Suppl. Figure 1.** Applying radiotherapy alone or prior to inducing FT-necrosis in the GL261 cells does not improve DC vaccine-induced antitumor immunity. Kaplan-Meier graph depicting survival of mice prophylactically immunized on days 14 and 7 prior to intracranial GL261 tumor inoculation with FT+IR-DC vaccines ( $\Delta$ , dashed line,  $n = 17$ ), IR+FT-DC vaccines ( $\blacksquare$ ,  $n = 9$ ) and IR-DC vaccines ( $\blacktriangledown$ ,  $n = 9$ ). Mice not immunized with vaccines were used as controls ( $\bullet$ ,  $n = 9$ ). \*,  $p < 0.05$  (Log-rank test).
